# Supplementary material for: From ascorbic acid to furan derivatives: the gas phase acid catalyzed degradation of vitamin C
Source: Royal Society of Chemistry journal article supplement (doi:10.1039/c8cp01893f), 2018-01-01
Supplement: c8cp01893f2.pdf [file c8cp01893f2.pdf]

Structure coordinates and negative frequencies of the transition states.

Structure 1

| Atom | X          | Y          | Z          |
|------|------------|------------|------------|
| C    | 0.2901340  | 0.1828820  | -0.7711520 |
| C    | -0.8518490 | 1.0511960  | -0.3420670 |
| C    | -1.9168930 | 0.2741730  | 0.0511000  |
| C    | -1.4870400 | -1.0513490 | -0.1385870 |
| O    | -0.2621130 | -1.1728900 | -0.6078970 |
| H    | 0.5132080  | 0.2996200  | -1.8369900 |
| O    | -2.2093670 | -2.1047400 | 0.1111260  |
| O    | -3.0892230 | 0.7587650  | 0.5002460  |
| H    | -3.7163410 | 0.0657990  | 0.7571410  |
| O    | -0.7271600 | 2.3544100  | -0.3659640 |
| H    | -1.5210140 | 2.8115700  | -0.0325390 |
| C    | 1.5711770  | 0.3488290  | 0.0832550  |
| C    | 2.7487370  | -0.4968740 | -0.4262210 |
| H    | 1.8505800  | 1.4051840  | -0.0134190 |
| H    | 2.5724920  | -1.5617550 | -0.2002350 |
| H    | 2.8314620  | -0.3995780 | -1.5135880 |
| O    | 3.9720280  | -0.0383640 | 0.0974430  |
| H    | 4.0229280  | -0.2036120 | 1.0490120  |
| O    | 1.2792210  | 0.1369030  | 1.4508230  |
| H    | 1.3726730  | -0.8011450 | 1.6724590  |
| H    | -1.7586740 | -2.9419050 | -0.1060200 |

Structure TS1 (negative frequency= -741.03cm<sup>-1</sup>)

| Atom | X          | Y          | Z          |
|------|------------|------------|------------|
| C    | -0.6758290 | 0.9564630  | -0.3673510 |
| C    | -1.8531330 | 0.3848050  | -0.0157750 |
| C    | -1.8185900 | -1.0675430 | 0.0054480  |
| O    | -0.7646190 | -1.6634860 | -0.2629110 |
| O    | -2.9612050 | -1.6608450 | 0.3240190  |
| O    | -2.9276200 | 1.1534360  | 0.2760170  |
| H    | -3.6469240 | 0.6346770  | 0.6678790  |
| O    | -0.4212280 | 2.2702170  | -0.4207940 |
| H    | -1.1913700 | 2.7815230  | -0.1144150 |
| C    | 1.6849900  | 0.0965860  | -0.0319070 |
| C    | 2.8459010  | -0.8223640 | -0.3954940 |
| H    | 1.6298420  | 1.0106390  | -0.8914640 |
| H    | 2.6195990  | -1.8114690 | 0.0249320  |
| H    | 2.9502310  | -0.9092270 | -1.4834020 |
| O    | 3.9762790  | -0.2269970 | 0.2132530  |
| H    | 4.7077390  | -0.8554970 | 0.2829840  |
| O    | 1.6970530  | 0.6035930  | 1.2094250  |
| H    | 2.6252300  | 0.6268340  | 1.5166430  |
| H    | -2.8594590 | -2.6299950 | 0.3278930  |
| C    | 0.4638650  | 0.0747240  | -0.7471700 |
| H    | 0.4926100  | -0.3908590 | -1.7296250 |

Structure 2

| Atom | X | Y | Z |
|------|---|---|---|
|------|---|---|---|

|   |            |            |            |
|---|------------|------------|------------|
| C | -0.4820470 | 0.8434420  | -0.3870560 |
| C | -1.7222250 | 0.4416480  | -0.0194950 |
| C | -2.1584010 | -0.9663110 | -0.0220440 |
| O | -1.4697640 | -1.9312710 | -0.3244440 |
| O | -3.4451200 | -1.0675160 | 0.3595260  |
| O | -2.5862500 | 1.4302360  | 0.3610700  |
| H | -3.4596900 | 1.0655720  | 0.5701350  |
| O | -0.1150560 | 2.1442850  | -0.3720650 |
| H | -0.8618720 | 2.6951820  | -0.0772330 |
| C | 1.8221720  | -0.0748230 | -0.0448840 |
| C | 3.1839420  | -0.3913720 | -0.5878470 |
| H | 3.1244940  | -1.3151200 | -1.1841080 |
| H | 3.4651200  | 0.4286640  | -1.2674680 |
| O | 4.0293740  | -0.5110930 | 0.5314150  |
| H | 4.9620410  | -0.3719570 | 0.3153380  |
| O | 1.7380660  | 0.1403290  | 1.2055190  |
| H | 2.6410940  | 0.0363550  | 1.6126330  |
| H | -3.7142000 | -2.0029380 | 0.3450320  |
| C | 0.6108290  | -0.0584580 | -0.8761960 |
| H | 0.8871240  | 0.1617430  | -1.9158470 |
| H | 0.2202720  | -1.1020100 | -0.8615130 |

Structure TS2 (negative frequency= -2055.67 cm<sup>-1</sup>)

| Atom | X          | Y          | Z          |
|------|------------|------------|------------|
| C    | 0.5223090  | -1.4156740 | 0.4036280  |
| C    | 1.4598250  | -0.4416090 | -0.1671170 |
| C    | 1.5576600  | 1.0542350  | 0.0729590  |
| O    | 0.5417790  | 1.7113180  | 0.1739530  |
| O    | 2.8047470  | 1.4863320  | 0.1358190  |
| O    | 2.2304520  | -1.0558940 | -0.9619680 |
| H    | 1.6507920  | -2.0391320 | -0.4774410 |
| O    | 0.1743410  | -1.1829170 | 1.7405760  |
| H    | 0.6234250  | -1.8192450 | 2.3153050  |
| C    | -1.5275270 | -0.4750060 | -0.5151500 |
| C    | -2.2711580 | 0.1266990  | 0.6412540  |
| H    | -3.1148240 | -0.5362470 | 0.8867120  |
| H    | -1.6112740 | 0.1475410  | 1.5179450  |
| O    | -2.7558700 | 1.3896760  | 0.2294810  |
| H    | -2.3495230 | 2.1010650  | 0.7455170  |
| O    | -1.5233980 | 0.2084860  | -1.5970300 |
| H    | -2.0068120 | 1.0630370  | -1.4045020 |
| H    | 2.8236050  | 2.4517300  | 0.2811140  |
| C    | -0.7443830 | -1.7246110 | -0.4682270 |
| H    | -1.2830470 | -2.5247610 | 0.0449290  |
| H    | -0.4891090 | -2.0441960 | -1.4803210 |

Structure 3

| Atom | X         | Y          | Z          |
|------|-----------|------------|------------|
| C    | 0.8186250 | -1.4655810 | 0.1129480  |
| C    | 1.8441370 | -0.3549730 | -0.1844790 |
| C    | 1.3648180 | 1.0886120  | 0.0650130  |

|   |            |            |            |
|---|------------|------------|------------|
| O | 0.1727930  | 1.3696620  | 0.0274860  |
| O | 2.3451580  | 1.9414840  | 0.2661970  |
| O | 2.9535670  | -0.5875130 | -0.5930190 |
| H | 1.3381230  | -2.4078590 | -0.0876050 |
| O | 0.3885470  | -1.3727770 | 1.4648700  |
| H | 1.0095120  | -1.8277520 | 2.0520510  |
| C | -1.4305180 | -0.3586450 | -0.5342170 |
| C | -2.1647040 | -0.1431530 | 0.7659630  |
| H | -2.6464370 | -1.0961020 | 1.0310910  |
| H | -1.4572080 | 0.1020510  | 1.5593000  |
| O | -3.1487260 | 0.8430070  | 0.5178850  |
| H | -3.0613910 | 1.5940260  | 1.1213350  |
| O | -1.9004310 | 0.2604710  | -1.5420540 |
| H | -2.6211140 | 0.8695000  | -1.2072700 |
| H | 1.9947600  | 2.8458100  | 0.3733670  |
| C | -0.4246890 | -1.4269580 | -0.8017640 |
| H | -0.9619310 | -2.3771730 | -0.6608140 |
| H | -0.1275800 | -1.3729750 | -1.8531440 |

Structure TS3 (negative frequency =-1585.94 cm<sup>-1</sup>)

| Atom | X          | Y          | Z          |
|------|------------|------------|------------|
| C    | 1.3199130  | 0.0248060  | 0.2319930  |
| C    | 0.9500100  | 0.8931940  | -0.9610810 |
| C    | -0.5417760 | 1.1726610  | -0.7477350 |
| C    | -0.9427640 | -0.0818280 | -0.0021890 |
| O    | 0.0504080  | -0.5501900 | 0.6870620  |
| H    | 1.5368570  | 1.8110000  | -1.0307180 |
| H    | -1.1055700 | 1.3444900  | -1.6660080 |
| C    | -2.2370760 | -0.8044710 | 0.0650720  |
| O    | -2.3676530 | -1.9053200 | 0.5434300  |
| O    | -3.2038060 | -0.0388290 | -0.4796270 |
| H    | -4.0539680 | -0.5130450 | -0.4296370 |
| H    | 1.1226920  | 0.3047620  | -1.8671420 |
| O    | -0.6287870 | 2.2720210  | 0.1619830  |
| H    | -1.5379890 | 2.6041150  | 0.2163530  |
| C    | 2.4341370  | -0.9358040 | 0.1386170  |
| H    | 2.4006640  | -1.7717720 | 0.8401240  |
| O    | 2.8630290  | -1.1985580 | -1.1311440 |
| H    | 3.3443090  | -2.0374160 | -1.1739570 |
| H    | 2.8109060  | 0.3066220  | 1.1825870  |
| O    | 1.7853160  | 0.7492170  | 1.4741960  |
| H    | 1.5993790  | 1.7131730  | 1.5331350  |

Structure 4

| Atom | X          | Y          | Z          |
|------|------------|------------|------------|
| C    | 1.6151320  | -0.2028640 | -0.1549960 |
| C    | 1.2588060  | 1.2462020  | -0.3024710 |
| C    | -0.2424320 | 1.1962840  | -0.6799490 |
| C    | -0.6032750 | -0.2293380 | -0.2787770 |
| O    | 0.4275970  | -0.9591020 | -0.1187210 |
| H    | 1.3694400  | 1.7794490  | 0.6492980  |
| H    | -0.3757980 | 1.2340430  | -1.7743570 |

|   |            |            |            |
|---|------------|------------|------------|
| C | -1.9357570 | -0.9316380 | -0.2877670 |
| O | -2.0875140 | -2.0699590 | 0.0678630  |
| O | -2.8712610 | -0.0954990 | -0.7647920 |
| H | -3.7303860 | -0.5561170 | -0.7941070 |
| H | 1.8637410  | 1.7546980  | -1.0550000 |
| O | -0.9731470 | 2.2096060  | -0.0457920 |
| H | -1.7526150 | 2.4475800  | -0.5678930 |
| C | 2.7585520  | -0.9019830 | -0.0366340 |
| H | 2.7426860  | -1.9846700 | 0.0612870  |
| O | 3.9274940  | -0.2539980 | -0.0443720 |
| H | 4.6783990  | -0.8592780 | 0.0401100  |
| H | -1.1919630 | -0.1085790 | 2.7772540  |
| O | -0.8576970 | 0.4104740  | 2.0318030  |
| H | -1.2334380 | 1.3007310  | 2.0990520  |

Structure TS4 (negative frequency=-1917.71cm<sup>-1</sup>)

| Atom | X          | Y          | Z          |
|------|------------|------------|------------|
| C    | 1.4099720  | -0.2167410 | -0.0736830 |
| C    | 1.1262810  | 1.1220360  | -0.5132550 |
| C    | -0.3612790 | 1.2343910  | -0.4804950 |
| C    | -0.7899290 | -0.1168210 | -0.1138640 |
| O    | 0.2368850  | -0.8817020 | 0.1910540  |
| H    | 0.8392910  | 1.9898490  | 0.6209720  |
| H    | -0.9533780 | 1.7976290  | -1.1962230 |
| C    | -2.1385450 | -0.7284740 | -0.0287300 |
| O    | -2.3330220 | -1.8634450 | 0.3323960  |
| O    | -3.0680680 | 0.1658930  | -0.4117310 |
| H    | -3.9473370 | -0.2518440 | -0.3664480 |
| H    | 1.7615960  | 1.6403400  | -1.2237980 |
| O    | -0.3716130 | 2.1194290  | 0.8901960  |
| H    | -0.8607920 | 2.9710730  | 0.9138250  |
| C    | 2.5432980  | -0.9638170 | 0.1310530  |
| H    | 2.4670430  | -1.9918080 | 0.4788000  |
| O    | 3.7232140  | -0.4269070 | -0.1028110 |
| H    | 4.4556250  | -1.0448240 | 0.0538750  |

Structure 5

| Atom | X          | Y          | Z          |
|------|------------|------------|------------|
| C    | -1.5008910 | -0.1785270 | -0.1456130 |
| C    | -1.2381310 | -1.1968310 | 0.7943320  |
| C    | 0.1403780  | -1.3743680 | 0.8031180  |
| C    | 0.6530040  | -0.4563230 | -0.1193940 |
| O    | -0.3098240 | 0.2469290  | -0.6986970 |
| H    | 1.3880630  | 2.6337140  | 1.0262230  |
| H    | 0.7250620  | -2.0637170 | 1.3942420  |
| C    | 2.0514110  | -0.1509750 | -0.5583540 |
| O    | 2.3170160  | 0.7086300  | -1.3600490 |
| O    | 2.9102460  | -0.9724660 | 0.0586200  |
| H    | 3.8159320  | -0.7679720 | -0.2366670 |
| H    | -1.9819910 | -1.7206530 | 1.3799180  |
| O    | 1.0384290  | 1.8572550  | 1.4851320  |
| H    | 1.2170980  | 2.0122940  | 2.4223870  |

|   |            |           |            |
|---|------------|-----------|------------|
| C | -2.6411010 | 0.4447000 | -0.6013000 |
| H | -2.5666360 | 1.2256810 | -1.3572620 |
| O | -3.8109660 | 0.1031420 | -0.1282560 |
| H | -4.5447550 | 0.6066810 | -0.5195690 |

Structure TS5 (negative frequency=-1731.19 cm<sup>-1</sup>)

| Atom | X          | Y          | Z          |
|------|------------|------------|------------|
| C    | 1.3986890  | 0.0486670  | 0.0722110  |
| O    | 0.2029400  | -0.6504660 | 0.1208090  |
| C    | -0.7787380 | 0.2529560  | 0.0387710  |
| C    | -0.2874050 | 1.5535650  | 0.0125090  |
| C    | 1.1003840  | 1.4444680  | 0.0944770  |
| C    | -2.2085410 | -0.1949470 | -0.0379210 |
| O    | -2.3190150 | -1.5214820 | -0.0498430 |
| O    | -3.0942620 | 0.6238340  | -0.0737110 |
| C    | 2.6669100  | -0.6163730 | 0.4628660  |
| O    | 3.4276770  | -0.5485970 | -0.5186500 |
| H    | 2.9526320  | -1.0709810 | 1.4155090  |
| H    | -3.2618160 | -1.7677310 | -0.0962230 |
| H    | 2.2784670  | -0.0135530 | -1.0543460 |
| H    | 1.8303630  | 2.2450770  | 0.1077510  |
| H    | -0.8861590 | 2.4508560  | -0.0590060 |

Structure 6

| Atom | X          | Y          | Z          |
|------|------------|------------|------------|
| C    | 1.5652330  | 0.2173090  | -0.7631910 |
| O    | 0.2816620  | -0.4258680 | -0.7957070 |
| C    | -0.5624120 | 0.3246500  | -0.1483320 |
| C    | -0.0034710 | 1.5605800  | 0.2640330  |
| C    | 1.2992550  | 1.5344370  | -0.1528350 |
| C    | -1.9831970 | -0.1363690 | 0.0823520  |
| O    | -2.2072900 | -1.3355570 | -0.4351880 |
| O    | -2.7432780 | 0.5859240  | 0.6789710  |
| C    | 2.5140560  | -0.6552310 | 0.2062280  |
| O    | 2.0522420  | -1.2923320 | 1.0981470  |
| H    | 3.5862060  | -0.5735440 | -0.0384580 |
| H    | -3.1306160 | -1.6037900 | -0.2667550 |
| H    | 2.0492860  | 2.3057360  | -0.0153240 |
| H    | -0.5379000 | 2.3375080  | 0.7935790  |
| H    | 1.9895460  | 0.2045090  | -1.7723470 |

Structure TS6 (negative frequency=-75.69 cm<sup>-1</sup>)

| Atom | X          | Y          | Z          |
|------|------------|------------|------------|
| C    | -2.4200090 | 0.3244670  | 0.1965100  |
| O    | -0.0176940 | -0.3788990 | 1.4604230  |
| C    | 0.5012760  | 0.2392710  | 0.5590270  |
| C    | -0.2095990 | 1.3768400  | -0.1049750 |
| C    | -1.5892590 | 1.4101160  | -0.0627550 |
| C    | 1.9036810  | -0.1697960 | 0.0143720  |
| O    | 2.4466510  | 0.8574620  | -0.6525830 |
| O    | 2.3570290  | -1.2599780 | 0.1984930  |

|   |            |            |            |
|---|------------|------------|------------|
| C | -2.1135010 | -1.0779940 | -0.2792950 |
| O | -1.2801380 | -1.2715420 | -1.1366370 |
| H | -2.7099440 | -1.8845920 | 0.1753660  |
| H | 3.3356190  | 0.6148560  | -0.9760180 |
| H | -2.0680820 | 2.3845510  | -0.1904410 |
| H | 0.3676680  | 2.1940030  | -0.5305180 |
| H | -3.4075700 | 0.4974180  | 0.6267000  |

Structure 7

| Atom | X          | Y          | Z          |
|------|------------|------------|------------|
| C    | 2.6133770  | 1.0063620  | -0.1676390 |
| O    | -0.9290000 | -1.8088180 | -0.1317360 |
| C    | -0.7466640 | -0.6373320 | -0.0126060 |
| C    | 0.6703150  | -0.0956850 | 0.4300070  |
| C    | 1.2931850  | 1.2150980  | 0.1380740  |
| C    | -1.8578680 | 0.4402560  | -0.0611620 |
| O    | -3.0549520 | -0.1155820 | -0.0615740 |
| O    | -1.5836480 | 1.6202430  | -0.0639800 |
| C    | 2.7872250  | -0.3949550 | -0.1872970 |
| O    | 1.7038350  | -1.0560040 | 0.0935020  |
| H    | 3.6720710  | -0.9895090 | -0.3976820 |
| H    | -3.7442050 | 0.5750910  | -0.0841630 |
| H    | 0.7703450  | 2.1561900  | 0.2561040  |
| H    | 0.5798400  | -0.1524310 | 1.5325390  |
| H    | 3.3800100  | 1.7416710  | -0.3733770 |

Structure TS7 (negative frequencu= -731.43 cm-1)

| Atom | X          | Y          | Z          |
|------|------------|------------|------------|
| C    | 2.6360610  | 0.9797630  | 0.0005690  |
| O    | -0.9992870 | -1.8535410 | -0.0500560 |
| C    | -0.7018000 | -0.6453380 | 0.1367610  |
| C    | 0.6674640  | -0.1175390 | 0.0109800  |
| C    | 1.2613600  | 1.1761430  | 0.0683850  |
| C    | -1.8962270 | 0.4605430  | -0.0124510 |
| O    | -3.0460390 | -0.1644630 | -0.0432050 |
| O    | -1.6424820 | 1.6308810  | -0.0841870 |
| C    | 2.8245930  | -0.4031220 | -0.0750590 |
| O    | 1.6574760  | -1.0599650 | -0.0538780 |
| H    | 3.7135310  | -1.0164660 | -0.1567250 |
| H    | -3.7770680 | 0.4751830  | -0.1505540 |
| H    | 0.7155720  | 2.1083920  | 0.1033260  |
| H    | -0.5737910 | -0.4219320 | 1.2883400  |
| H    | 3.4157090  | 1.7288400  | -0.0088980 |

Structure 8

| Atom | X          | Y          | Z          |
|------|------------|------------|------------|
| C    | 2.6538820  | 1.0045940  | 0.0024220  |
| O    | -1.0042350 | -1.8773940 | -0.0280380 |
| C    | -0.3759590 | -0.9278420 | 0.0843310  |
| C    | 0.7563460  | -0.1526070 | 0.0634890  |
| C    | 1.2615300  | 1.1524720  | 0.1027750  |

|   |            |            |            |
|---|------------|------------|------------|
| C | -2.0837780 | 0.6962840  | 0.2717000  |
| O | -3.0989380 | -0.0866110 | -0.0688470 |
| O | -1.7008910 | 1.7421420  | -0.1901240 |
| C | 2.9131130  | -0.3532070 | -0.0924020 |
| O | 1.7923760  | -1.0646520 | -0.0651870 |
| H | 3.8282420  | -0.9229700 | -0.1855640 |
| H | -3.6929760 | 0.3479330  | -0.7126110 |
| H | 0.6806810  | 2.0617560  | 0.1755810  |
| H | -1.5839040 | 0.2429430  | 1.1577310  |
| H | 3.3917820  | 1.7942810  | -0.0077730 |
