# Supplementary figures and images for: From ascorbic acid to furan derivatives: the gas phase acid catalyzed degradation of vitamin C
Source: Royal Society of Chemistry journal article supplement (doi:10.1039/c8cp01893f), 2018-01-01

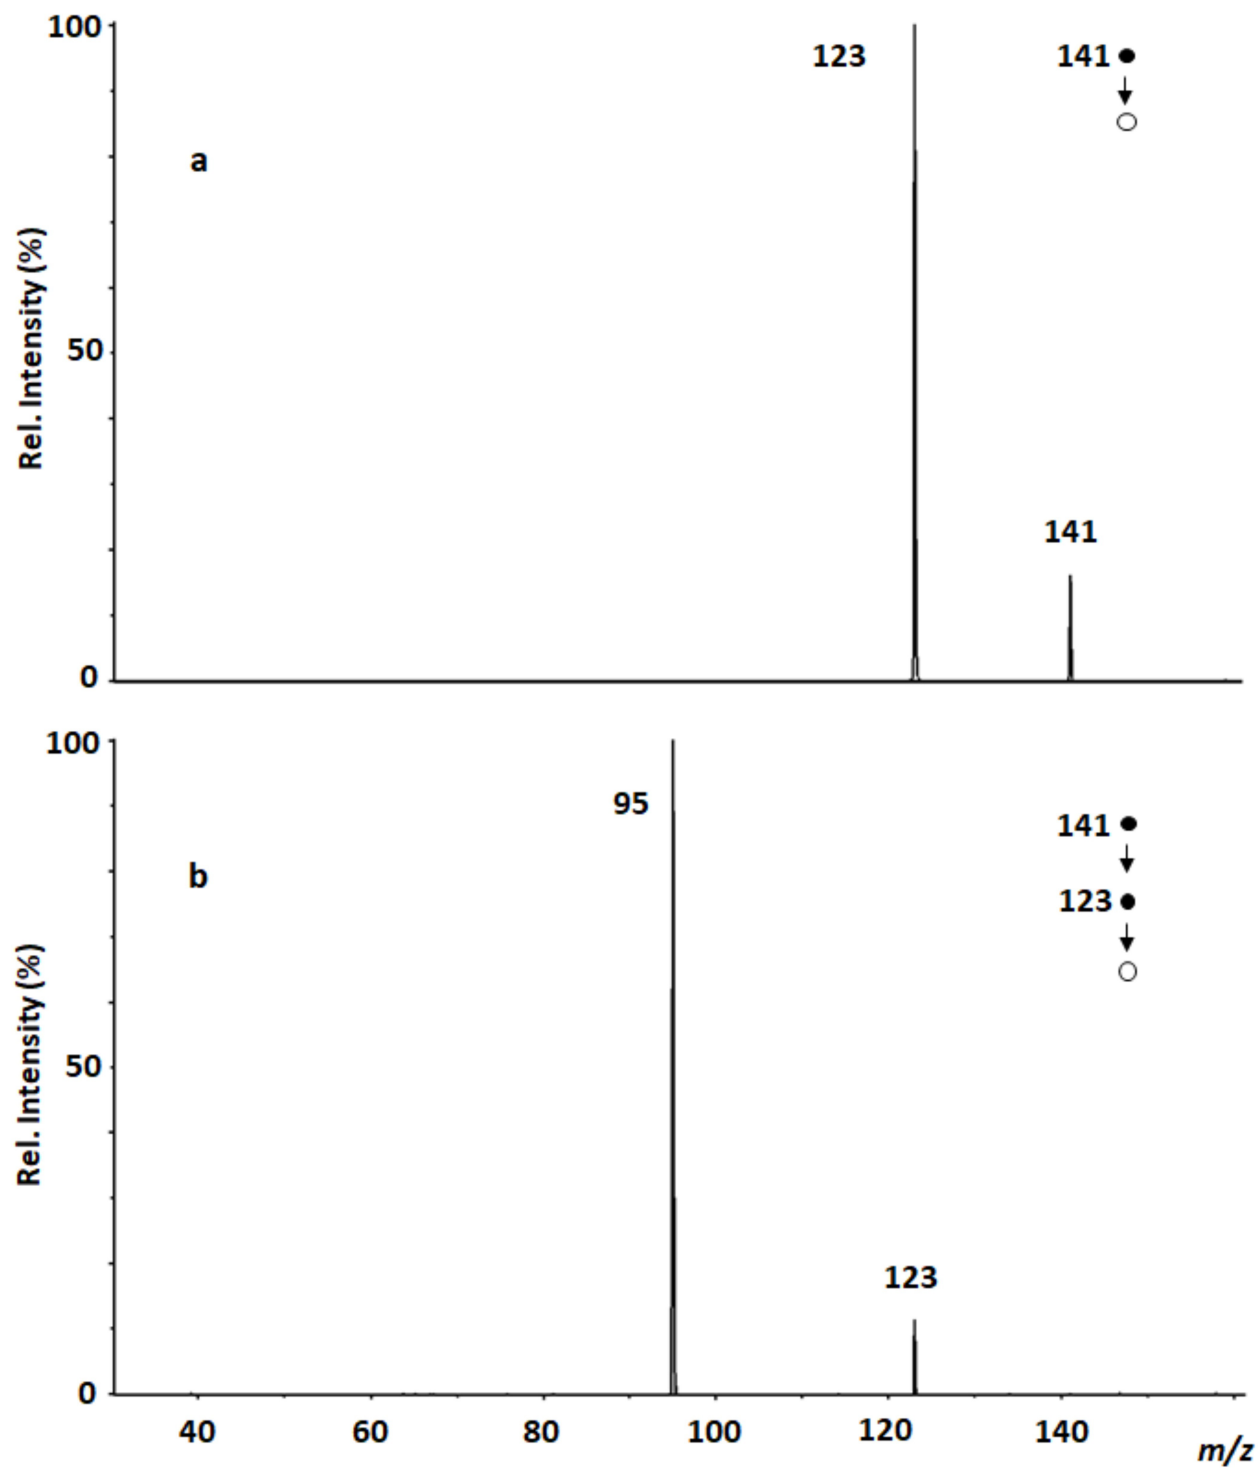

Supplement: c8cp01893f1.pdf [file c8cp01893f1.pdf]
